# Supplementary material for: Acoustic Atomization-Induced Pumping Based on a Vibrating Sharp-Tip Capillary
Source: Micromachines (Basel). 2023 Jun 8;14(6):1212. doi: 10.3390/mi14061212 (PMC10301781; doi:10.3390/mi14061212)
Supplement: Supplementary file 1 [file micromachines-14-01212-s001.zip › micromachines-2416728 Supporting information.pdf]

# Supporting Information

## Acoustic atomization induced pumping based on a vibrating sharp-tip capillary

Balapuwaduge Lihini Mendis<sup>1</sup>, Ziyi He<sup>2</sup>, Xiaojun Li<sup>1</sup>, Jing Wang<sup>1</sup>, Chong Li<sup>1</sup>, Peng Li<sup>1\*</sup>

1. C. Eugene Bennett Department of Chemistry, West Virginia University, Morgantown, WV, USA.

2. College of Veterinary Medicine, Huazhong Agricultural University, Wuhan, Hubei 430070, China.

\* Correspondence and requests for materials should be addressed to P.L.  
([peng.li@mail.wvu.edu](mailto:peng.li@mail.wvu.edu))

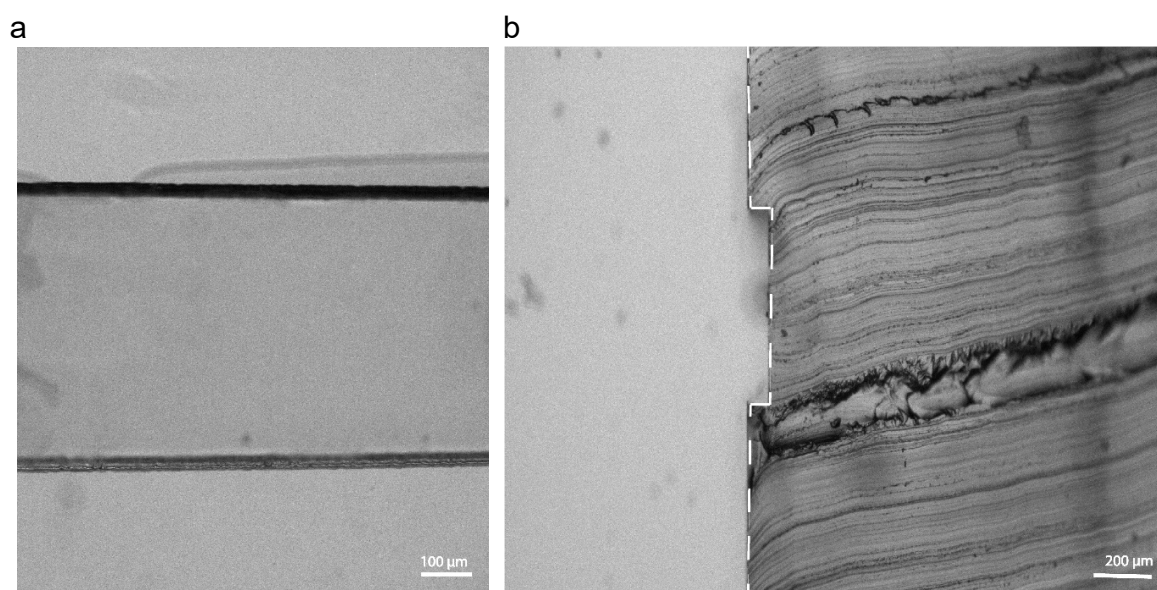

**Figure S1.** Microscopic images of the PDMS microchannel. a) overview of the channel showing a width of 600 μm. b) cross section the channel showing a height of 90 μm.

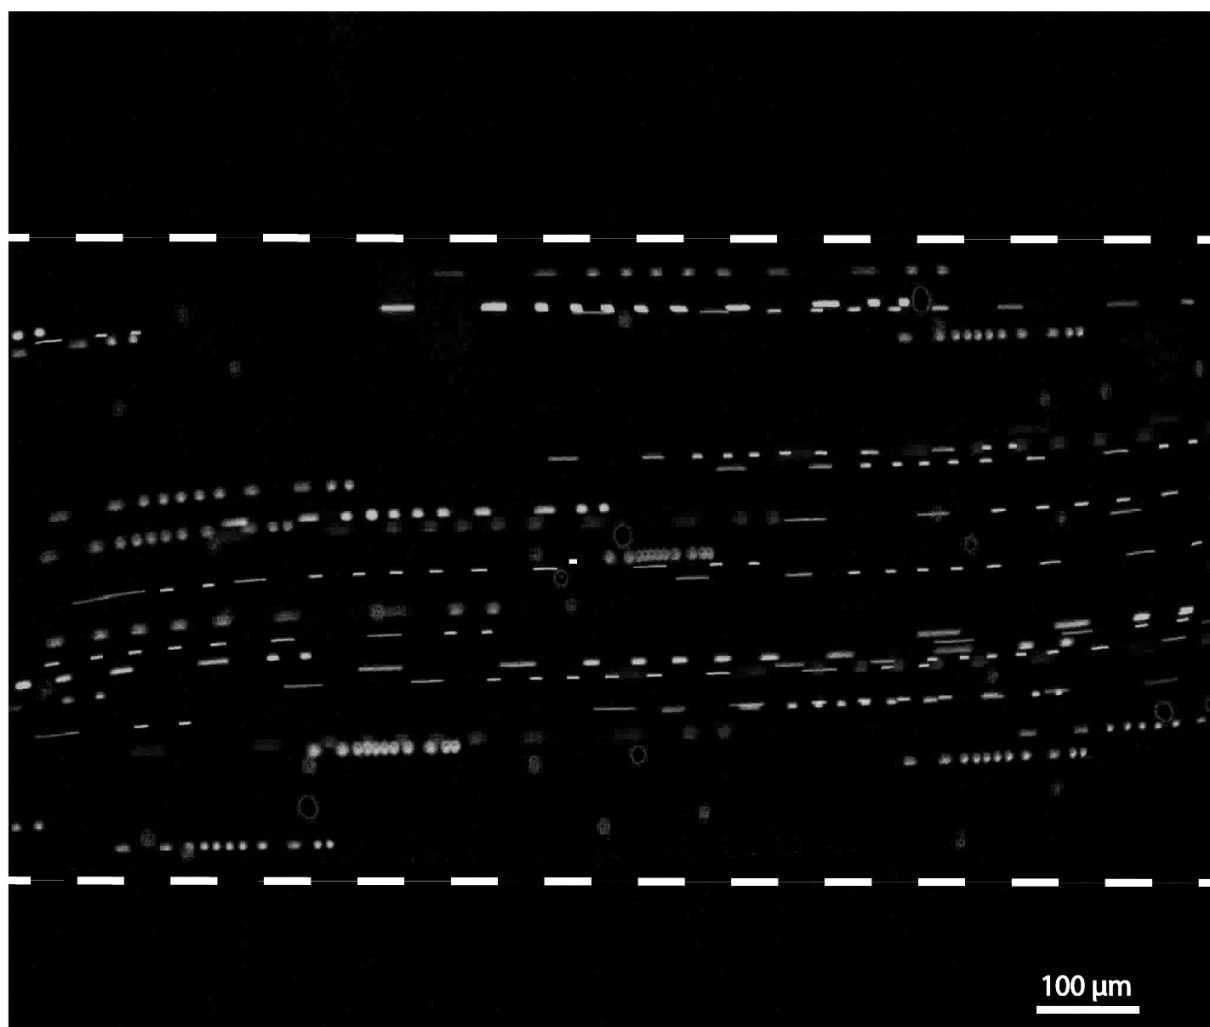

**Figure S2.** Stacked images of showing beads movement in a PDMS microchannel with a flow rate of  $\sim 5 \mu\text{L}/\text{min}$ .
